# Supplementary material for: Development of Gelatin-Coated Microspheres for Novel Bioink Design
Source: MDPI journal article supplement (doi:10.3390/polym13193339), 2021-09-29
Supplement: s1 [file s1]

## Supplimentary Materials

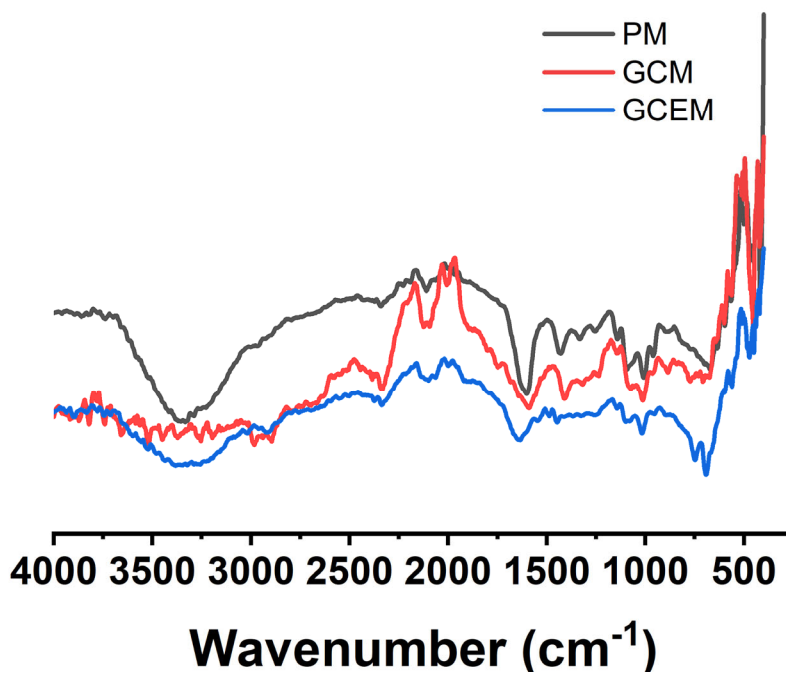

**Figure S1:** FTIR spectra (400-4000 cm<sup>-1</sup>) of calcium-pectin microspheres (PM), microspheres after gelatin coating (GCM), and GCM after EDC catalysis (GCEM).
